# Supplementary material
Source: ML conference proceedings conference paper supplement (https://proceedings.neurips.cc/paper_files/paper/2017/hash/81ca0262c82e712e50c580c032d99b60-Abstract.html)
Supplement: Supplementary file [file 81ca0262c82e712e50c580c032d99b60-Supplemental.zip]

---

# Supplementary Material of “Non-Convex Finite-Sum Optimization Via SCSG Methods”

---

**Lihua Lei**

UC Berkeley

lihua.lei@berkeley.edu

**Cheng Ju**

UC Berkeley

cju@berkeley.edu

**Jianbo Chen**

UC Berkeley

jianbochen@berkeley.edu

**Michael I. Jordan**

UC Berkeley

jordan@stat.berkeley.edu

## A Technical Lemmas

In this section we present several technical lemmas that facilitate the proofs of our main results.

We start with a lemma on the variance of the sample mean (without replacement).

**Lemma A.1** *Let  $x_1, \dots, x_M \in \mathbb{R}^d$  be an arbitrary population of  $N$  vectors with*

$$\sum_{j=1}^M x_j = 0.$$

*Further let  $\mathcal{J}$  be a uniform random subset of  $\{1, \dots, M\}$  with size  $m$ . Then*

$$\mathbb{E} \left\| \frac{1}{m} \sum_{j \in \mathcal{J}} x_j \right\|^2 = \frac{M-m}{(M-1)m} \cdot \frac{1}{M} \sum_{j=1}^M \|x_j\|^2 \leq \frac{I(m < M)}{m} \cdot \frac{1}{M} \sum_{j=1}^M \|x_j\|^2.$$

**Proof** Let  $W_j = I(j \in \mathcal{J})$ , then it is easy to see that

$$\mathbb{E}W_j^2 = \mathbb{E}W_j = \frac{m}{M}, \quad \mathbb{E}W_j W_{j'} = \frac{m(m-1)}{M(M-1)}. \quad (1)$$

Then the sample mean can be rewritten as

$$\frac{1}{m} \sum_{j \in \mathcal{J}} x_j = \frac{1}{m} \sum_{i=1}^n W_i x_i.$$

This implies that

$$\begin{aligned} \mathbb{E} \left\| \frac{1}{m} \sum_{j \in \mathcal{J}} x_j \right\|^2 &= \frac{1}{m^2} \left( \sum_{j=1}^M \mathbb{E}W_j^2 \|x_j\|^2 + \sum_{j \neq j'} \mathbb{E}W_j W_{j'} \langle x_j, x_{j'} \rangle \right) \\ &= \frac{1}{m^2} \left( \frac{m}{M} \sum_{j=1}^M \|x_j\|^2 + \frac{m(m-1)}{M(M-1)} \sum_{j \neq j'} \langle x_j, x_{j'} \rangle \right) \end{aligned}$$

$$\begin{aligned}
&= \frac{1}{m^2} \left( \left( \frac{m}{M} - \frac{m(m-1)}{M(M-1)} \right) \sum_{j=1}^M \|x_j\|^2 + \frac{m(m-1)}{M(M-1)} \left\| \sum_{j=1}^M x_j \right\|^2 \right) \\
&= \frac{1}{m^2} \left( \frac{m}{M} - \frac{m(m-1)}{M(M-1)} \right) \sum_{j=1}^M \|x_j\|^2 \\
&= \frac{M-m}{(M-1)m} \cdot \frac{1}{M} \sum_{j=1}^M \|x_j\|^2.
\end{aligned}$$

■

Since the geometric random variable  $N_j$  plays an important role in the analysis, we present the key property as below.

**Lemma A.2** *Let  $N \sim \text{Geom}(\gamma)$  for some  $B > 0$ . Then for any sequence  $D_0, D_1, \dots$ ,*

$$\mathbb{E}(D_N - D_{N+1}) = \left( \frac{1}{\gamma} - 1 \right) (D_0 - \mathbb{E}D_N).$$

**Proof** By definition,

$$\begin{aligned}
\mathbb{E}(D_N - D_{N+1}) &= \sum_{n \geq 0} (D_n - D_{n+1}) \cdot \gamma^n (1 - \gamma) \\
&= (1 - \gamma) \left( D_0 - \sum_{n \geq 1} D_n (\gamma^{n-1} - \gamma^n) \right) = (1 - \gamma) \left( \frac{1}{\gamma} D_0 - \sum_{n \geq 0} D_n (\gamma^{n-1} - \gamma^n) \right) \\
&= (1 - \gamma) \left( \frac{1}{\gamma} D_0 - \frac{1}{\gamma} \sum_{n \geq 0} D_n \gamma^n (1 - \gamma) \right) = \left( \frac{1}{\gamma} - 1 \right) (D_0 - \mathbb{E}D_N).
\end{aligned}$$

■

**Lemma A.3** *For any  $\eta > 1$  and  $z > 0$ , define  $g_\eta(x)$  and  $x(z)$  as*

$$g_\eta(x) = \frac{1 + \log x}{x^\eta}, \quad x(z) = z^{-\frac{1}{\eta}} \cdot \left( \frac{2}{\eta} \log \frac{1}{z} \vee 2 \right)^{\frac{1}{\eta-1}}.$$

*Then*

$$g_\eta(x) \leq z \quad \forall x \geq x(z).$$

**Proof** For any  $x \geq x(z)$ , denote  $\alpha = x/z^{-\frac{1}{\eta}}$ . Then

$$\alpha \geq \left( \frac{2}{\eta} \log \frac{1}{z} \vee 2 \right)^{\frac{1}{\eta-1}} \geq 1$$

and

$$g_\eta(x) = \frac{1 + \log \alpha + \frac{1}{\eta} \log \frac{1}{z}}{\alpha^\eta z^{-1}} \leq z \cdot \frac{2(1 + \log \alpha) \left( \frac{1}{\eta} \log \frac{1}{z} \vee 1 \right)}{\alpha^\eta}.$$

Taking the logarithm of both sides, we obtain that

$$\begin{aligned}
\log g_\eta(x) - \log z &\leq \log(1 + \log \alpha) - \eta \log \alpha + \log \left( \frac{2}{\eta} \log \frac{1}{z} \vee 2 \right) \\
&\leq \log \left( \frac{2}{\eta} \log \frac{1}{z} \vee 2 \right) - (\eta - 1) \log \alpha \\
&\leq 0.
\end{aligned}$$

■

## B One-Epoch Analysis

As in the standard analysis of stochastic gradient methods, We start by establishing a bound of  $\mathbb{E}_{\tilde{\mathcal{I}}_k} \|\nu_k^{(j)}\|^2$  and  $\mathbb{E}_{\mathcal{I}_j} \|e_j\|^2$ .

**Lemma B.1** *Under Assumption A1,*

$$\mathbb{E}_{\tilde{\mathcal{I}}_k} \|\nu_k^{(j)}\|^2 \leq \frac{L^2}{b_j} \|x_k^{(j)} - x_0^{(j)}\|^2 + 2\|\nabla f(x_k^{(j)})\|^2 + 2\|e_j\|^2.$$

**Proof** Using the fact that  $\mathbb{E}\|Z\|^2 = \mathbb{E}\|Z - \mathbb{E}Z\|^2 + \|\mathbb{E}Z\|^2$  (for any random variable  $Z$ ), we have

$$\begin{aligned} \mathbb{E}_{\tilde{\mathcal{I}}_k} \|\nu_k^{(j)}\|^2 &= \mathbb{E}_{\tilde{\mathcal{I}}_k} \|\nu_k^{(j)} - \mathbb{E}_{\tilde{\mathcal{I}}_k} \nu_k^{(j)}\|^2 + \|\mathbb{E}_{\tilde{\mathcal{I}}_k} \nu_k^{(j)}\|^2 \\ &= \mathbb{E}_{\tilde{\mathcal{I}}_k} \|\nabla f_{\tilde{\mathcal{I}}_k}(x_k^{(j)}) - \nabla f_{\tilde{\mathcal{I}}_k}(x_0^{(j)}) - (\nabla f(x_k^{(j)}) - \nabla f(x_0^{(j)}))\|^2 + \|\nabla f(x_k^{(j)}) + e_j\|^2 \\ &\leq \mathbb{E}_{\tilde{\mathcal{I}}_k} \|\nabla f_{\tilde{\mathcal{I}}_k}(x_k^{(j)}) - \nabla f_{\tilde{\mathcal{I}}_k}(x_0^{(j)}) - (\nabla f(x_k^{(j)}) - \nabla f(x_0^{(j)}))\|^2 + 2\|\nabla f(x_k^{(j)})\|^2 + 2\|e_j\|^2. \end{aligned}$$

By Lemma A.1,

$$\begin{aligned} &\mathbb{E}_{\tilde{\mathcal{I}}_k} \|\nabla f_{\tilde{\mathcal{I}}_k}(x_k^{(j)}) - \nabla f_{\tilde{\mathcal{I}}_k}(x_0^{(j)}) - (\nabla f(x_k^{(j)}) - \nabla f(x_0^{(j)}))\|^2 \\ &\leq \frac{1}{b_j} \cdot \frac{1}{n} \sum_{i=1}^n \|\nabla f_i(x_k^{(j)}) - \nabla f_i(x_0^{(j)}) - (\nabla f(x_k^{(j)}) - \nabla f(x_0^{(j)}))\|^2 \\ &= \frac{1}{b_j} \cdot \left( \frac{1}{n} \sum_{i=1}^n \|\nabla f_i(x_k^{(j)}) - \nabla f_i(x_0^{(j)})\|^2 - \|(\nabla f(x_k^{(j)}) - \nabla f(x_0^{(j)}))\|^2 \right) \\ &\leq \frac{1}{b_j} \cdot \frac{1}{n} \sum_{i=1}^n \|\nabla f_i(x_k^{(j)}) - \nabla f_i(x_0^{(j)})\|^2 \\ &\leq \frac{1}{b_j} \cdot L^2 \|x_k^{(j)} - x_0^{(j)}\|^2, \end{aligned}$$

where the last line uses Assumption A1. Therefore,

$$\mathbb{E}_{\tilde{\mathcal{I}}_k} \|\nu_k^{(j)}\|^2 \leq \frac{L^2}{b_j} \|x_k^{(j)} - x_0^{(j)}\|^2 + 2\|\nabla f(x_k^{(j)})\|^2 + 2\|e_j\|^2. \quad \blacksquare$$

**Lemma B.2**

$$\mathbb{E}_{\mathcal{I}_j} \|e_j\|^2 \leq \frac{I(B_j < n)}{B_j} \cdot \mathcal{H}^*.$$

**Proof** Since  $\tilde{x}_{j-1}$  is independent of  $\mathcal{I}_j$ , conditioning on  $\tilde{x}_{j-1}$  and applying Lemma A.1, we have

$$\begin{aligned} \mathbb{E}_{\mathcal{I}_j} \|e_j\|^2 &= \frac{n - B_j}{(n-1)B_j} \cdot \frac{1}{n} \sum_{i=1}^n \|\nabla f_i(\tilde{x}_{j-1}) - \nabla f(\tilde{x}_{j-1})\|^2 \\ &\leq \frac{n - B_j}{(n-1)B_j} \cdot \mathcal{H}^* \leq \frac{I(B_j < n)}{B_j} \cdot \mathcal{H}^* \quad \blacksquare \end{aligned}$$

Based on Lemma A.2, Lemma B.1 and Lemma B.2, we can derive bounds for primal and dual gaps respectively.

**Lemma B.3** *Suppose  $\eta_j L < 1$ , then under Assumption A1,*

$$\eta_j B_j (1 - \eta_j L) \mathbb{E} \|\nabla f(\tilde{x}_j)\|^2 + \eta_j B_j \mathbb{E} \langle e_j, \nabla f(\tilde{x}_j) \rangle$$

$$\leq b_j \mathbb{E} (f(\tilde{x}_{j-1}) - f(\tilde{x}_j)) + \frac{L^3 \eta_j^2 B_j}{2b_j} \mathbb{E} \|\tilde{x}_j - \tilde{x}_{j-1}\|^2 + L\eta_j^2 B_j \mathbb{E} \|e_j\|^2. \quad (2)$$

where  $\mathbb{E}$  denotes the expectation with respect to all randomness.

**Proof** By (4) in the page 3 of the main text,

$$\begin{aligned} \mathbb{E}_{\tilde{\mathcal{I}}_k} f(x_{k+1}^{(j)}) &\leq f(x_k^{(j)}) - \eta_j \langle \mathbb{E}_{\tilde{\mathcal{I}}_k} \nu_k, \nabla f(x_k^{(j)}) \rangle + \frac{L\eta_j^2}{2} \mathbb{E}_{\tilde{\mathcal{I}}_k} \|\nu_k\|^2 \\ &= f(x_k^{(j)}) - \eta_j \|\nabla f(x_k^{(j)})\|^2 - \eta_j \langle e_j, \nabla f(x_k^{(j)}) \rangle + \frac{L\eta_j^2}{2} \mathbb{E}_{\tilde{\mathcal{I}}_k} \|\nu_k\|^2 \\ &\leq f(x_k^{(j)}) - \eta_j (1 - \eta_j L) \|\nabla f(x_k^{(j)})\|^2 - \eta_j \langle e_j, \nabla f(x_k^{(j)}) \rangle \\ &\quad + \frac{L^3 \eta_j^2}{2b_j} \|x_k^{(j)} - x_0^{(j)}\|^2 + L\eta_j^2 \|e_j\|^2. \quad (\text{Lemma B.1}) \end{aligned}$$

Let  $\mathbb{E}_j$  denotes the expectation over  $\tilde{\mathcal{I}}_0, \tilde{\mathcal{I}}_1, \dots$ , given  $N_j$ . Note that  $\mathbb{E}_j$  is equivalent to the expectation over  $\tilde{\mathcal{I}}_0, \tilde{\mathcal{I}}_1, \dots$  as  $N_j$  is independent of them. Since  $\tilde{\mathcal{I}}_{k+1}, \tilde{\mathcal{I}}_{k+2}, \dots$  are independent of  $x_k^{(j)}$ , the above inequality implies that

$$\eta_j (1 - \eta_j L) \mathbb{E}_j \|\nabla f(x_k^{(j)})\|^2 + \eta_j \mathbb{E}_j \langle e_j, \nabla f(x_k^{(j)}) \rangle \quad (3)$$

$$\leq \mathbb{E}_j f(x_k^{(j)}) - \mathbb{E}_j f(x_{k+1}^{(j)}) + \frac{L^3 \eta_j^2}{2b_j} \mathbb{E}_j \|x_k^{(j)} - x_0^{(j)}\|^2 + L\eta_j^2 \|e_j\|^2. \quad (4)$$

Let  $k = N_j$  in (4). By taking expectation with respect to  $N_j$  and using Fubini's theorem, we arrive at

$$\begin{aligned} &\eta_j (1 - \eta_j L) \mathbb{E}_{N_j} \mathbb{E}_j \|\nabla f(x_{N_j}^{(j)})\|^2 + \eta_j \mathbb{E}_{N_j} \mathbb{E}_j \langle e_j, \nabla f(x_{N_j}^{(j)}) \rangle \\ &\leq \mathbb{E}_{N_j} \left( \mathbb{E}_j f(x_{N_j}^{(j)}) - \mathbb{E}_j f(x_{N_j+1}^{(j)}) \right) + \frac{L^3 \eta_j^2}{2b_j} \mathbb{E}_{N_j} \mathbb{E}_j \mathbb{E} \|x_{N_j}^{(j)} - x_0^{(j)}\|^2 + L\eta_j^2 \|e_j\|^2 \\ &= \frac{b_j}{B_j} \left( f(x_0^{(j)}) - \mathbb{E}_j \mathbb{E}_{N_j} f(x_{N_j}^{(j)}) \right) + \frac{L^3 \eta_j^2}{2b_j} \mathbb{E}_j \mathbb{E}_{N_j} \|x_{N_j}^{(j)} - x_0^{(j)}\|^2 + L\eta_j^2 \|e_j\|^2. \quad (\text{Lemma A.2}) \quad (5) \end{aligned}$$

The lemma is then proved by substituting  $x_{N_j}^{(j)}(x_0^{(j)})$  by  $\tilde{x}_j(\tilde{x}_{j-1})$ , and taking expectation over all past randomness.  $\blacksquare$

**Lemma B.4** Suppose  $\eta_j^2 L^2 B_j < b_j^2$ , then under Assumption A1,

$$\begin{aligned} &\left( b_j - \frac{\eta_j^2 L^2 B_j}{b_j} \right) \mathbb{E} \|\tilde{x}_j - \tilde{x}_{j-1}\|^2 + 2\eta_j B_j \mathbb{E} \langle e_j, \tilde{x}_j - \tilde{x}_{j-1} \rangle \\ &\leq -2\eta_j B_j \mathbb{E} \langle \nabla f(\tilde{x}_j), \tilde{x}_j - \tilde{x}_{j-1} \rangle + 2\eta_j^2 B_j \mathbb{E} \|\nabla f(\tilde{x}_j)\|^2 + 2\eta_j^2 B_j \mathbb{E} \|e_j\|^2. \quad (6) \end{aligned}$$

**Proof** Since  $x_{k+1}^{(j)} = x_k^{(j)} - \eta_j \nu_k^{(j)}$ , we have

$$\begin{aligned} &\mathbb{E}_{\tilde{\mathcal{I}}_k} \|x_{k+1}^{(j)} - x_0^{(j)}\|^2 \\ &= \|x_k^{(j)} - x_0^{(j)}\|^2 - 2\eta_j \langle \mathbb{E}_{\tilde{\mathcal{I}}_k} \nu_k^{(j)}, x_k^{(j)} - x_0^{(j)} \rangle + \eta_j^2 \mathbb{E}_{\tilde{\mathcal{I}}_k} \|\nu_k^{(j)}\|^2 \\ &= \|x_k^{(j)} - x_0^{(j)}\|^2 - 2\eta_j \langle \nabla f(x_k^{(j)}), x_k^{(j)} - x_0^{(j)} \rangle - 2\eta_j \langle e_j, x_k^{(j)} - x_0^{(j)} \rangle + \eta_j^2 \mathbb{E}_{\tilde{\mathcal{I}}_k} \|\nu_k^{(j)}\|^2 \\ &\leq \left( 1 + \frac{\eta_j^2 L^2}{b_j} \right) \|x_k^{(j)} - x_0^{(j)}\|^2 - 2\eta_j \langle \nabla f(x_k^{(j)}), x_k^{(j)} - x_0^{(j)} \rangle - 2\eta_j \langle e_j, x_k^{(j)} - x_0^{(j)} \rangle \\ &\quad + 2\eta_j^2 \|\nabla f(x_k^{(j)})\|^2 + 2\eta_j^2 \|e_j\|^2. \quad (\text{Lemma B.1}) \end{aligned}$$

Using the same notation  $\mathbb{E}_j$  as in the proof of Lemma B.3, we have

$$2\eta_j \mathbb{E}_j \langle \nabla f(x_k^{(j)}), x_k^{(j)} - x_0^{(j)} \rangle + 2\eta_j \mathbb{E}_j \langle e_j, x_k^{(j)} - x_0^{(j)} \rangle$$

$$\leq \left(1 + \frac{\eta_j^2 L^2}{b_j}\right) \mathbb{E}_j \|x_k^{(j)} - x_0^{(j)}\|^2 - \mathbb{E}_j \|x_{k+1}^{(j)} - x_0^{(j)}\|^2 + 2\eta_j^2 \|\nabla f(x_k^{(j)})\|^2 + 2\eta_j^2 \|e_j\|^2. \quad (7)$$

Let  $k = N_j$  in (7). By taking expectation with respect to  $N_j$  and using Fubini's theorem, we arrive at

$$\begin{aligned} & 2\eta_j \mathbb{E}_{N_j} \mathbb{E}_j \langle \nabla f(x_{N_j}^{(j)}), x_{N_j}^{(j)} - x_0^{(j)} \rangle + 2\eta_j \mathbb{E}_j \langle e_j, x_{N_j}^{(j)} - x_0^{(j)} \rangle \\ & \leq \left(1 + \frac{\eta_j^2 L^2}{b_j}\right) \mathbb{E}_{N_j} \mathbb{E}_j \|x_{N_j}^{(j)} - x_0^{(j)}\|^2 - \mathbb{E}_{N_j} \mathbb{E}_j \|x_{N_j+1}^{(j)} - x_0^{(j)}\|^2 + 2\eta_j^2 \mathbb{E}_{N_j} \|\nabla f(x_{N_j}^{(j)})\|^2 + 2\eta_j^2 \|e_j\|^2 \\ & = \left(-\frac{b_j}{B_j} + \frac{\eta_j^2 L^2}{b_j}\right) \mathbb{E}_{N_j} \mathbb{E}_j \|x_{N_j}^{(j)} - x_0^{(j)}\|^2 + 2\eta_j^2 \mathbb{E}_{N_j} \|\nabla f(x_{N_j}^{(j)})\|^2 + 2\eta_j^2 \|e_j\|^2. \quad (\text{Lemma A.2}) \end{aligned} \quad (8)$$

The lemma is then proved by substituting  $x_{N_j}^{(j)}(x_0^{(j)})$  by  $\tilde{x}_j(\tilde{x}_{j-1})$  and taking expectation further on the past randomness. ■

**Lemma B.5**

$$b_j \mathbb{E} \langle e_j, \tilde{x}_j - \tilde{x}_{j-1} \rangle = -\eta_j B_j \mathbb{E} \langle e_j, \nabla f(\tilde{x}_j) \rangle - \eta_j B_j \mathbb{E} \|e_j\|^2. \quad (9)$$

**Proof** Let  $M_k^{(j)} = \langle e_j, x_k^{(j)} - x_0^{(j)} \rangle$ . By definition, we have

$$\mathbb{E}_{N_j} \langle e_j, \tilde{x}_j - \tilde{x}_{j-1} \rangle = \mathbb{E}_{N_j} M_{N_j}^{(j)}.$$

Since  $N_j$  is independent of  $(x_0^{(j)}, e_j)$ , this implies that

$$\mathbb{E} \langle e_j, \tilde{x}_j - \tilde{x}_{j-1} \rangle = \mathbb{E} M_{N_j}^{(j)}.$$

Also we have  $M_0^{(j)} = 0$ . On the other hand,

$$\begin{aligned} \mathbb{E}_{\tilde{\mathcal{L}}_k} \left( M_{k+1}^{(j)} - M_k^{(j)} \right) &= \mathbb{E}_{\tilde{\mathcal{L}}_k} \langle e_j, x_{k+1}^{(j)} - x_k^{(j)} \rangle = -\eta_j \langle e_j, \mathbb{E}_{\tilde{\mathcal{L}}_k} \nu_k^{(j)} \rangle \\ &= -\eta_j \langle e_j, \nabla f(x_k^{(j)}) \rangle - \eta_j \|e_j\|^2. \end{aligned}$$

Using the same notation  $\mathbb{E}_j$  as in the proof of Lemma B.3 and Lemma B.4, we have

$$\mathbb{E}_j \left( M_{k+1}^{(j)} - M_k^{(j)} \right) = -\eta_j \langle e_j, \mathbb{E}_j \nabla f(x_k^{(j)}) \rangle - \eta_j \|e_j\|^2. \quad (10)$$

Let  $k = N_j$  in (10). By taking an expectation with respect to  $N_j$  and using Lemma A.2, we obtain that

$$\frac{b_j}{B_j} \mathbb{E}_{N_j} M_{N_j}^{(j)} = -\eta_j \langle e_j, \mathbb{E}_{N_j} \mathbb{E}_j \nabla f(x_{N_j}^{(j)}) \rangle - \eta_j \|e_j\|^2.$$

The lemma is then proved by substituting  $x_{N_j}^{(j)}(x_0^{(j)})$  by  $\tilde{x}_j(\tilde{x}_{j-1})$  and taking a further expectation with respect to the past randomness. ■

**Proof [Theorem 3.1]** Multiplying equation (2) by 2, equation (6) by  $\frac{b_j}{\eta_j B_j}$  and summing them, we obtain that

$$\begin{aligned} & 2\eta_j B_j \left(1 - \eta_j L - \frac{b_j}{B_j}\right) \mathbb{E} \|\nabla f(\tilde{x}_j)\|^2 + \frac{b_j^3 - \eta_j^2 L^2 b_j B_j - \eta_j^3 L^3 B_j^2}{b_j \eta_j B_j} \mathbb{E} \|\tilde{x}_j - \tilde{x}_{j-1}\|^2 \\ & + 2\eta_j B_j \mathbb{E} \langle e_j, \nabla f(\tilde{x}_j) \rangle + 2b_j \mathbb{E} \langle e_j, \tilde{x}_j - \tilde{x}_{j-1} \rangle \\ & \leq -2b_j \mathbb{E} \langle \nabla f(\tilde{x}_j), \tilde{x}_j - \tilde{x}_{j-1} \rangle + 2b_j \mathbb{E} (f(\tilde{x}_{j-1}) - f(\tilde{x}_j)) + (2L\eta_j^2 B_j + 2\eta_j b_j) \mathbb{E} \|e_j\|^2. \quad (11) \end{aligned}$$

By Lemma B.5, the second row can be simplified as

$$2\eta_j B_j \mathbb{E} \langle e_j, \nabla f(\tilde{x}_j) \rangle + 2b_j \mathbb{E} \langle e_j, \tilde{x}_j - \tilde{x}_{j-1} \rangle = -2\eta_j B_j \mathbb{E} \|e_j\|^2.$$

Using the fact that  $2\langle a, b \rangle \leq \beta \|a\|^2 + \frac{1}{\beta} \|b\|^2$  for any  $\beta > 0$ , we have

$$\begin{aligned} & -2b_j \mathbb{E} \langle \nabla f(\tilde{x}_j), \tilde{x}_j - \tilde{x}_{j-1} \rangle \\ & \leq \frac{b_j \eta_j B_j}{b_j^3 - \eta_j^2 L^2 b_j B_j - \eta_j^3 L^3 B_j^2} \cdot b_j^2 \mathbb{E} \|\nabla f(\tilde{x}_j)\|^2 + \frac{b_j^3 - \eta_j^2 L^2 b_j B_j - \eta_j^3 L^3 B_j^2}{b_j \eta_j B_j} \mathbb{E} \|\tilde{x}_j - \tilde{x}_{j-1}\|^2. \end{aligned}$$

Putting the pieces together, we conclude that

$$\begin{aligned} & \frac{\eta_j B_j}{b_j} \left( 2 - \frac{2b_j}{B_j} - 2\eta_j L - \frac{b_j^3}{b_j^3 - \eta_j^2 L^2 b_j B_j - \eta_j^3 L^3 B_j^2} \right) \mathbb{E} \|\nabla f(\tilde{x}_j)\|^2 \\ & \leq 2\mathbb{E}(f(\tilde{x}_{j-1}) - f(\tilde{x}_j)) + \frac{2\eta_j B_j}{b_j} \left( 1 + \eta_j L + \frac{b_j}{B_j} \right) \mathbb{E} \|e_j\|^2. \end{aligned} \quad (12)$$

Since  $\eta_j L = \theta_j = \gamma(b_j/B_j)^{\frac{2}{3}}$  and  $b_j \geq 1, B_j \geq 8b_j \geq 8$ ,

$$b_j^3 - \eta_j^2 L^2 b_j B_j - \eta_j^3 L^3 B_j^2 = b_j^3 \left( 1 - \gamma^2 \cdot b_j^{-\frac{2}{3}} B_j^{-\frac{1}{3}} - \gamma^3 \cdot b_j^{-1} \right) \geq b_j^3 (1 - \gamma^2/2 - \gamma^3).$$

Then (12) can be simplified as

$$\begin{aligned} & \gamma \left( \frac{B_j}{b_j} \right)^{\frac{1}{3}} \left( 2 - \frac{2b_j}{B_j} - 2\gamma \left( \frac{b_j}{B_j} \right)^{\frac{2}{3}} - \frac{1}{1 - \gamma^2/2 - \gamma^3} \right) \mathbb{E} \|\nabla f(\tilde{x}_j)\|^2 \\ & \leq 2L\mathbb{E}(f(\tilde{x}_{j-1}) - f(\tilde{x}_j)) + 2\gamma \left( 1 + \gamma \left( \frac{b_j}{B_j} \right)^{\frac{2}{3}} + \frac{b_j}{B_j} \right) \left( \frac{B_j}{b_j} \right)^{\frac{1}{3}} \mathbb{E} \|e_j\|^2 \\ & \leq 2L\mathbb{E}(f(\tilde{x}_{j-1}) - f(\tilde{x}_j)) + 2\gamma \left( 1 + \gamma \left( \frac{b_j}{B_j} \right)^{\frac{2}{3}} + \frac{b_j}{B_j} \right) \frac{I(B_j < n)}{b_j^{\frac{1}{3}} B_j^{\frac{2}{3}}} \cdot \mathcal{H}^* \text{ (By Lemma B.2).} \end{aligned} \quad (13)$$

Since  $B_j \geq 8b_j, \gamma \leq \frac{1}{3}$ , we have

$$2 - \frac{2b_j}{B_j} - 2\gamma \left( \frac{b_j}{B_j} \right)^{\frac{2}{3}} - \frac{1}{1 - \gamma^2/2 - \gamma^3} \geq 2 - \frac{1}{4} - \frac{\gamma}{2} - \frac{1}{1 - \gamma^2/2 - \gamma^3} \geq 0.482$$

and

$$1 + \gamma \left( \frac{b_j}{B_j} \right)^{\frac{2}{3}} + \frac{b_j}{B_j} \leq 1 + \frac{\gamma}{4} + \frac{1}{8} \leq 1.209.$$

Thus, (13) implies that

$$\left( \frac{B_j}{b_j} \right)^{\frac{1}{3}} \mathbb{E} \|\nabla f(\tilde{x}_j)\|^2 \leq \frac{5L}{\gamma} \cdot \mathbb{E}(f(\tilde{x}_{j-1}) - f(\tilde{x}_j)) + \frac{6I(B_j < n)}{b_j^{\frac{1}{3}} B_j^{\frac{2}{3}}} \cdot \mathcal{H}^*. \quad (14)$$

■

## C Convergence Analysis for Smooth Objectives

**Proof [Theorem 3.2]** Since  $\tilde{x}_T^*$  is a random element from  $(\tilde{x}_j)_{j=1}^T$  with

$$P(\tilde{x}_T^* = \tilde{x}_j) \propto \frac{\eta_j B_j}{b_j} \propto (B_j/b_j)^{\frac{1}{3}},$$

we have

$$\mathbb{E} \|\nabla f(\tilde{x}_T^*)\|^2 \leq \frac{\frac{5L}{\gamma} \cdot \mathbb{E}(f(\tilde{x}_0) - f(\tilde{x}_{T+1})) + 6 \left( \sum_{j=1}^T b_j^{-\frac{1}{3}} B_j^{-\frac{2}{3}} I(B_j < n) \right) \mathcal{H}^*}{\sum_{j=1}^T b_j^{-\frac{1}{3}} B_j^{\frac{1}{3}}}$$

$$\leq \frac{\frac{5L}{\gamma} \cdot (f(\tilde{x}_0) - f^*) + 6 \left( \sum_{j=1}^T b_j^{-\frac{1}{3}} B_j^{-\frac{2}{3}} I(B_j < n) \right) \mathcal{H}^*}{\sum_{j=1}^T b_j^{-\frac{1}{3}} B_j^{\frac{1}{3}}}.$$

■

**Proof [Corollary 3.3]** By Theorem 3.2,

$$\mathbb{E} \|\nabla f(\tilde{x}_T^*)\|^2 \leq \frac{30\Delta_f + 6TB^{-\frac{2}{3}}I(B < n) \cdot \mathcal{H}^*}{TB^{\frac{1}{3}}} = \frac{30\Delta_f}{TB^{\frac{1}{3}}} + \frac{6\mathcal{H}^* \cdot I(B < n)}{B}.$$

Let  $\tilde{T}(\epsilon)$  be the minimum number of epochs such that

$$\frac{30\Delta_f}{\tilde{T}(\epsilon)B^{\frac{1}{3}}} \leq \frac{\epsilon}{2}.$$

Then under the setting of the corollary, for any  $T \geq \tilde{T}(\epsilon)$ ,

$$\mathbb{E} \|\nabla f(\tilde{x}_T^*)\|^2 \leq \frac{\epsilon}{2} + \frac{6\mathcal{H}^* \cdot I(B < n)}{B} \leq \frac{\epsilon}{2} \leq \epsilon.$$

By definition, we know that  $T(\epsilon) \leq \tilde{T}(\epsilon)$ . Noticing that

$$\tilde{T}(\epsilon) = O\left(\left\lceil \frac{\Delta_f}{\epsilon B^{\frac{1}{3}}} \right\rceil\right) = O\left(1 + \frac{\Delta_f}{\epsilon B^{\frac{1}{3}}}\right),$$

we conclude that

$$\mathbb{E}C_{\text{comp}}(\epsilon) = O(T(\epsilon)B) = O(\tilde{T}(\epsilon)B) = O\left(B + \frac{\Delta_f}{\epsilon} \cdot B^{\frac{2}{3}}\right).$$

The corollary is then proved by substituting for  $B$ .

■

**Proof [Corollary 3.4]** By Theorem 3.2,

$$\mathbb{E} \|\nabla f(\tilde{x}_T^*)\|^2 \leq \frac{30\Delta_f + 6 \sum_{j=1}^T \frac{I(B_j < n)}{j} \mathcal{H}^*}{\sum_{j=1}^T (j^{\frac{1}{2}} \wedge n^{\frac{1}{3}})} \triangleq W(T).$$

Let  $T_* = \lfloor n^{\frac{2}{3}} \rfloor$ . First we prove that  $W(T)$  is strictly decreasing.

1. When  $T \geq T_*$ , the numerator is a constant and the denominator is strictly increasing. Thus,  $W(T)$  is strictly decreasing on  $[T_*, \infty)$ ;
2. When  $T < T_*$ , let  $a_{1j} = \frac{6\mathcal{H}^*}{j}$  and  $a_{2j} = j^{\frac{1}{2}}$ . Further let

$$U(T) = \frac{30\Delta_f}{\sum_{j=1}^T a_{2j}}, \quad V(T) = \frac{\sum_{j=1}^T a_{1j}}{\sum_{j=1}^T a_{2j}},$$

then

$$W(T) = U(T) + V(T).$$

It is obvious that  $U(T)$  is strictly decreasing. Noticing that  $\frac{a_{1j}}{a_{2j}} = \frac{6\mathcal{H}^*}{j^{\frac{3}{2}}}$  is strictly decreasing, we also conclude that  $V(T)$  is strictly decreasing. Therefore,  $W(T)$  is strictly decreasing on  $[1, T_*]$ .

In summary,  $W(T)$  is strictly decreasing. Now we show that for any  $T \geq T(\epsilon)$ ,

$$W(T) \leq \epsilon,$$

which implies that  $\mathbb{E} \|\nabla f(\tilde{x}_T^*)\|^2 \leq \epsilon$ .

To do so, we distinguish two cases to analyze  $W(T)$ .

1. If  $T \leq T_*$ , then

$$W(T) = \frac{30\Delta_f + 6 \left( \sum_{j=1}^T \frac{1}{j} \right) \mathcal{H}^*}{\sum_{j=1}^T j^{\frac{1}{2}}}.$$

Since  $\frac{1}{j}$  is decreasing, we have

$$\sum_{j=1}^T \frac{1}{j} = 1 + \sum_{j=2}^T \frac{1}{j} \leq 1 + \int_1^T \frac{dx}{x} = 1 + \log T.$$

Similarly, since  $j^{\frac{1}{2}}$  is increasing, we have

$$\sum_{j=1}^T j^{\frac{1}{2}} \geq \int_0^T x^{\frac{1}{2}} dx = \frac{2}{3} T^{\frac{3}{2}}.$$

Therefore,

$$W(T) \leq \frac{45\Delta_f + 9(1 + \log T)\mathcal{H}^*}{T^{\frac{3}{2}}}.$$

2. If  $T > T_*$ , then

$$W(T) = \frac{30\Delta_f + 6 \left( \sum_{j=1}^{T_*} \frac{1}{j} \right) \mathcal{H}^*}{\sum_{j=1}^{T_*} j^{\frac{1}{2}} + n^{\frac{1}{3}}(T - T_*)} = W(T_*) \cdot \frac{\sum_{j=1}^{T_*} j^{\frac{1}{2}}}{\sum_{j=1}^{T_*} j^{\frac{1}{2}} + n^{\frac{1}{3}}(T - T_*)}. \quad (15)$$

Similar to the first case, we have

$$\sum_{j=1}^{T_*} j^{\frac{1}{2}} = \sum_{j=1}^{T_*-1} j^{\frac{1}{2}} + T_*^{\frac{1}{2}} \leq \int_1^{T_*} \sqrt{x} dx + n^{\frac{1}{3}} = \frac{2}{3}n + n^{\frac{1}{3}} - \frac{2}{3}.$$

Since

$$n^{\frac{1}{3}} - \frac{2}{3} = \frac{n-1}{n^{\frac{2}{3}} + n^{\frac{1}{3}} + 1} + \frac{1}{3} \leq \frac{n}{3},$$

we obtain that

$$\sum_{j=1}^{T_*} j^{\frac{1}{2}} \leq n.$$

As a result, (15) implies that

$$W(T) \leq W(T_*) \cdot \frac{1}{1 + n^{-\frac{2}{3}}(T - T_*)}$$

Putting the pieces together, we obtain that

$$W(T) \leq \begin{cases} \frac{45\Delta_f + 9(1 + \log T)\mathcal{H}^*}{T^{\frac{3}{2}}} & \triangleq W_1(T) \quad (T \leq T_*) \\ \frac{W(T_*)}{1 + n^{-\frac{2}{3}}(T - T_*)} & \triangleq W_2(T) \quad (T > T_*) \end{cases}. \quad (16)$$

It is easy to see that both  $W_1(T)$  and  $W_2(T)$  are strictly decreasing and  $\lim_{T \rightarrow \infty} W_1(T) = \lim_{T \rightarrow \infty} W_2(T) = 0$ . Let

$$T_1(\epsilon) = \min\{T : W_1(T) \leq \epsilon\}, \quad T_2(\epsilon) = \min\{T \geq T_* : W_2(T) \leq \epsilon\}.$$

Recall that  $W(T)$  is also strictly decreasing, we have

$$T(\epsilon) \leq \begin{cases} T_1(\epsilon) & (W(T_*) \leq \epsilon) \\ T_2(\epsilon) & (W(T_*) > \epsilon) \end{cases}.$$

More concisely,

$$T(\epsilon) \leq T_1(\epsilon) \wedge T_* + (T_2(\epsilon) - T_*). \quad (17)$$



To derive a bound for  $T_1(\epsilon)$ , let  $\tilde{T}_1(\epsilon)$  be the minimum  $T$  such that

$$\frac{45\Delta_f}{T^{\frac{3}{2}}} \leq \frac{\epsilon}{2}, \quad \frac{9\mathcal{H}^*(1 + \log T)}{T^{\frac{3}{2}}} \leq \frac{\epsilon}{2}.$$

Then by Lemma A.3, we have

$$T_1(\epsilon) \leq \tilde{T}_1(\epsilon) = O\left(\left(\frac{\Delta_f}{\epsilon}\right)^{\frac{2}{3}} + \left(\frac{\mathcal{H}^*}{\epsilon}\right)^{\frac{2}{3}} \cdot \log^2\left(\frac{\mathcal{H}^*}{\epsilon}\right)\right).$$

On the other hand, it is straightforward to derive a bound for  $T_2(\epsilon)$  as

$$T_2(\epsilon) - T_* \leq \left(n^{\frac{2}{3}} \cdot \frac{W(T_*) - \epsilon}{\epsilon}\right)_+ \leq n^{\frac{2}{3}} \cdot \frac{W(T_*)}{\epsilon} = O\left(\frac{\Delta_f}{\epsilon n^{\frac{1}{3}}} + \frac{\mathcal{H}^* \log n}{\epsilon n^{\frac{1}{3}}}\right).$$

Therefore, we conclude that

$$T(\epsilon) = O\left(\min\left\{\frac{1}{\epsilon^{\frac{2}{3}}}\left[\Delta_f^{\frac{2}{3}} + (\mathcal{H}^*)^{\frac{2}{3}} \log^2\left(\frac{\mathcal{H}^*}{\epsilon}\right)\right], n^{\frac{2}{3}}\right\} + \frac{\Delta_f + \mathcal{H}^* \log n}{\epsilon n^{\frac{1}{3}}}\right). \quad (18)$$

Finally, to obtain the bound for the computation complexity, we notice that

$$\sum_{j=1}^T j^{\frac{3}{2}} = O(T^{\frac{5}{2}}).$$

Let  $x_+$  denote the positive part of  $x$ , i.e.,  $x_+ = \max\{x, 0\}$ . Therefore,

$$\begin{aligned} \mathbb{E}C_{\text{comp}}(\epsilon) &= O\left(\sum_{j=1}^{T(\epsilon)} B_j\right) = O\left((T(\epsilon) \wedge T_*)^{\frac{5}{2}} + n(T(\epsilon) - T_*)_+\right) \\ &= O\left((T_1(\epsilon) \wedge T_*)^{\frac{5}{2}} + n(T_2(\epsilon) - T_*)\right) \\ &= O\left(\min\left\{\frac{1}{\epsilon^{\frac{5}{3}}}\left[\Delta_f^{\frac{5}{3}} + (\mathcal{H}^*)^{\frac{5}{3}} \log^5\left(\frac{\mathcal{H}^*}{\epsilon}\right)\right], n^{\frac{5}{3}}\right\} + \frac{n^{\frac{2}{3}}}{\epsilon} \cdot (\Delta_f + \mathcal{H}^* \log n)\right). \end{aligned}$$

■

**Remark 1** The log-factor  $\log^5\left(\frac{1}{\epsilon}\right)$  can be reduced to  $\log^{\frac{3}{2}+\mu}\left(\frac{1}{\epsilon}\right)$  for any  $\mu > 0$  by setting  $B_j = \lceil j^{\frac{3}{2}}(\log j)^{\frac{3}{2}+\mu} \wedge n \rceil$ . In this case,

$$W(T) = \frac{30\Delta_f + 6\left(\sum_{j=1}^T \frac{I(B_j < n)}{j(\log j)^{1+\frac{2\mu}{3}}}\right)\mathcal{H}^*}{\sum_{j=1}^T j^{\frac{1}{2}}(\log j)^{\frac{1}{2}+\frac{\mu}{3}}}.$$

For any  $\mu > 0$ ,

$$\sum_{j=1}^T \frac{I(B_j < n)}{j(\log j)^{1+\frac{2\mu}{3}}} \leq 1 + \int_1^\infty \frac{1}{x(\log x)^{1+\frac{2\mu}{3}}} < \infty.$$

On the other hand, as proved above,

$$\sum_{j=1}^T j^{\frac{1}{2}}(\log j)^{\frac{1}{2}+\frac{\mu}{3}} \geq \sum_{j=1}^T j^{\frac{1}{2}} \sim T^{\frac{3}{2}}.$$

Thus,

$$W(T) \sim O\left(\frac{\Delta_f + \mathcal{H}^*}{T^{\frac{3}{2}}}\right).$$

Using similar arguments and treating  $\Delta_f, \mathcal{H}^* = O(1)$  for simplicity, we can obtain that

$$T(\epsilon) = O\left(\epsilon^{-\frac{2}{3}} \wedge n^{\frac{2}{3}} + \frac{1}{\epsilon n^{\frac{1}{3}}}\right).$$

If  $B_{T(\epsilon)} < n$ , then

$$\mathbb{E}C_{\text{comp}}(\epsilon) = O\left(\sum_{j=1}^{T(\epsilon)} j^{\frac{3}{2}} (\log j)^{\frac{3}{2}+\mu}\right) = O\left(T(\epsilon)^{\frac{5}{2}} \cdot (\log T(\epsilon))^{\frac{3}{2}+\mu}\right) = O\left(\epsilon^{-\frac{5}{3}} \log^{\frac{3}{2}+\mu}\left(\frac{1}{\epsilon}\right)\right).$$

If  $B_{T(\epsilon)} \geq n$ , we obtain the same bound as in Corollary 3.4.

## D Convergence Analysis for P-L Objectives

**Proof [Theorem 3.5]** By equation (14) in the proof of Theorem 3.2 (see p.6) and the P-L condition,

$$\begin{aligned} \mu \left(\frac{B_j}{b_j}\right)^{\frac{1}{3}} \mathbb{E}(f(\tilde{x}_j) - f^*) &\leq \left(\frac{B_j}{b_j}\right)^{\frac{1}{3}} \mathbb{E}\|\nabla f(\tilde{x}_j)\|^2 \\ &\leq \frac{5L}{\gamma} \cdot \mathbb{E}(f(\tilde{x}_{j-1}) - f(\tilde{x}_j)) + 6b_j^{-\frac{1}{3}} B_j^{-\frac{2}{3}} I(B_j < n) \cdot \mathcal{H}^*. \end{aligned}$$

For brevity, we write  $F_j$  for  $\mathbb{E}(f(\tilde{x}_j) - f^*)$ . Then

$$\left(\mu\gamma B_j^{\frac{1}{3}} + 5Lb_j^{\frac{1}{3}}\right) F_j \leq 5Lb_j^{\frac{1}{3}} F_{j-1} + 6\gamma B_j^{-\frac{2}{3}} I(B_j < n) \cdot \mathcal{H}^*. \quad (19)$$

By definition of  $\lambda_j$ , this can be reformulated as

$$F_j \leq \lambda_j F_{j-1} + 6\gamma \mathcal{H}^* \cdot \frac{I(B_j < n)}{\mu\gamma B_j + 5Lb_j^{\frac{1}{3}} B_j^{\frac{2}{3}}}.$$

Apply the above inequality iteratively for  $j = T, T-1, \dots, 1$ , we prove the result.  $\blacksquare$

**Proof [Corollary 3.6]** When  $B_j \equiv B, b_j \equiv 1$  and  $\gamma = \frac{1}{6}$ , (19) in the proof of Theorem 3.5 can be reformulated as

$$\left(\mu\gamma B^{\frac{1}{3}} + 30L\right) \left(F_j - \frac{6\mathcal{H}^* I(B < n)}{\mu B}\right) \leq 30L \left(F_{j-1} - \frac{6\mathcal{H}^* I(B < n)}{\mu B}\right).$$

This implies that

$$F_T \leq \left(\frac{30L}{\mu B^{\frac{1}{3}} + 30L}\right)^T \Delta_f + \frac{6\mathcal{H}^* I(B < n)}{\mu B}.$$

Under the setting of this problem,

$$\frac{6\mathcal{H}^* I(B < n)}{\mu B} \leq \frac{\epsilon}{2}.$$

By definition of  $T(\epsilon)$ , we have

$$T(\epsilon) \leq \log \frac{\Delta_f}{\epsilon} \Big/ \log \left(\frac{30L}{\mu B^{\frac{1}{3}} + 30L}\right) = O\left(\log \frac{\Delta_f}{\epsilon} \left(1 + \frac{L}{\mu B^{\frac{1}{3}}}\right)\right).$$

As a consequence,

$$\mathbb{E}C_{\text{comp}}(\epsilon) = O(T(\epsilon)B) = O\left(\left(B + \frac{LB^{\frac{2}{3}}}{\mu}\right) \log \frac{\Delta_f}{\epsilon}\right).$$

Plugging into  $B$ , we end up with

$$\mathbb{E}C_{\text{comp}}(\epsilon) = O\left(\left\{\left(\frac{\mathcal{H}^*}{\mu\epsilon} \wedge n\right) + \frac{1}{\mu} \left(\frac{\mathcal{H}^*}{\mu\epsilon} \wedge n\right)^{\frac{2}{3}}\right\} \log \frac{\Delta_f}{\epsilon}\right)$$

$\blacksquare$
